# Supplementary material for: Defining benefit threshold for extracorporeal membrane oxygenation in children with sepsis—a binational multicenter cohort study
Source: Springer Nature journal article supplement (doi:10.1186/s13054-019-2685-1), 2019-12-01

**Additional File 2: Kaplan-Meier time to death curve is shown (n=537, panel C) are shown out of 5,062 children admitted to ICU with sepsis/septic shock.** The median time from ICU admission to death was 53.0 hours (IQR: 15.2-189.2) across all patients and controls who died during hospital admission.

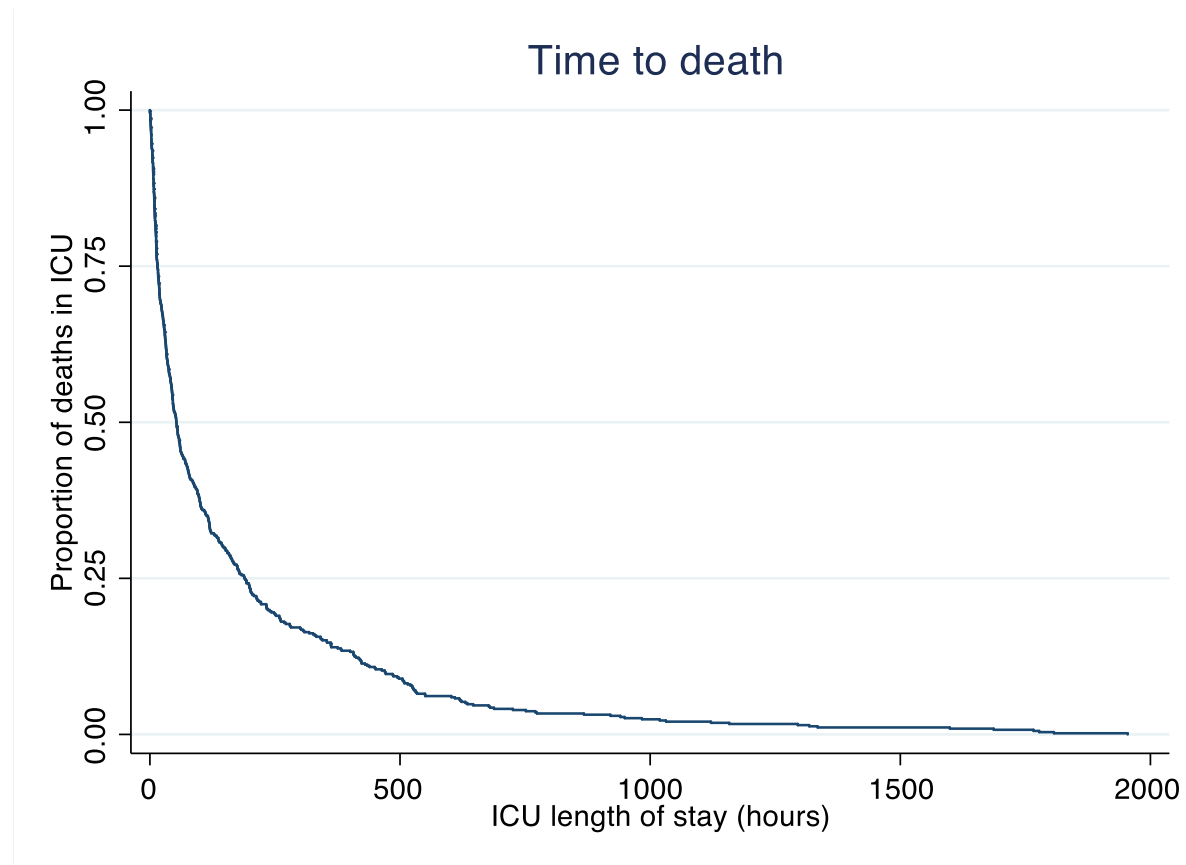

Supplement: MOESM2 [file 17789658]
