# Supplementary material for: Defining benefit threshold for extracorporeal membrane oxygenation in children with sepsis—a binational multicenter cohort study
Source: Springer Nature journal article supplement (doi:10.1186/s13054-019-2685-1), 2019-12-01
Supplement: MOESM3 [file 17789658]

**Additional File 3: Pathogens identified in 5,062 children admitted to Intensive Care Units with sepsis and septic shock compared between children receiving veno-arterial Extracorporeal Membrane Oxygenation (ECMO) and controls (no ECMO).**

|                       |                                                        | <b>Sepsis or septic<br/>shock on admission</b> |                            |                            |
|-----------------------|--------------------------------------------------------|------------------------------------------------|----------------------------|----------------------------|
| <i>Pathogen group</i> | <i>Pathogen</i>                                        | <b>No ECMO<br/>N=4982</b>                      | <b>ECMO group<br/>N=80</b> | <i>p-value<sup>a</sup></i> |
| <b>Bacteria</b>       | <i>N. meningitidis</i>                                 | 528 (10.6%)                                    | 10 (12.5%)                 | 0.58                       |
|                       | Group B streptococcus                                  | 118 (2.4%)                                     | 3 (3.8%)                   | 0.42                       |
|                       | Group A Streptococcus, viridans streptococcus          | 271 (5.4%)                                     | 13 (16.3%)                 | <0.001                     |
|                       | <i>S. pneumoniae</i>                                   | 133 (2.7%)                                     | 1 (1.3%)                   | 0.43                       |
|                       | <i>S. aureus</i>                                       | 494 (9.9%)                                     | 12 (15.0%)                 | 0.13                       |
|                       | <i>E. coli</i>                                         | 202 (4.1%)                                     | 2 (2.5%)                   | 0.48                       |
|                       | <i>Pseudomonas aeruginosa</i>                          | 115 (2.3%)                                     | 3 (3.8%)                   | 0.40                       |
|                       | <i>Klebsiella sp.</i>                                  | 98 (2.0%)                                      | 1 (1.3%)                   | 0.65                       |
|                       | <i>H. influenzae</i>                                   | 18 (0.4%)                                      | 0 (0.0%)                   | 0.59                       |
|                       | Other bacteria                                         | 476 (9.6%)                                     | 7 (8.8%)                   | 0.81                       |
|                       | <b><i>Sum of patients with bacterial diagnosis</i></b> |                                                | <b>2250 (45.2%)</b>        | <b>49 (61.3%)</b>          |
| <b>Virus</b>          | Influenza viruses                                      | 93 (1.9%)                                      | 1 (1.3%)                   | 0.69                       |
|                       | Parainfluenza viruses                                  | 63 (1.3%)                                      | 3 (3.8%)                   | 0.052                      |
|                       | Respiratory Syncytial Virus                            | 119 (2.4%)                                     | 2 (2.5%)                   | 0.95                       |
|                       | Adenovirus                                             | 74 (1.5%)                                      | 1 (1.3%)                   | 0.86                       |
|                       | Herpesviruses <sup>b</sup>                             | 113 (2.3%)                                     | 3 (3.8%)                   | 0.38                       |
|                       | Human Metapneumovirus                                  | 17 (0.3%)                                      | 1 (1.3%)                   | 0.18                       |
|                       | Enterovirus                                            | 69 (1.4%)                                      | 0 (0.0%)                   | 0.29                       |

|                                                      |                     |                   |              |
|------------------------------------------------------|---------------------|-------------------|--------------|
| Other virus                                          | 27 (0.5%)           | 0 (0.0%)          | 0.51         |
| <b><i>Sum of patients with viral coinfection</i></b> | <b>532 (10.7%)</b>  | <b>10 (12.5%)</b> | <b>0.60</b>  |
| <b><i>No organism identified</i></b>                 | <b>2367 (47.5%)</b> | <b>25 (31.3%)</b> | <b>0.004</b> |

<sup>a</sup> p-value based on Two-sample Wilcoxon rank-sum (Mann-Whitney) test

<sup>b</sup> CMV, EBV, VZV
