# Supplementary material for: Defining benefit threshold for extracorporeal membrane oxygenation in children with sepsis—a binational multicenter cohort study
Source: Springer Nature journal article supplement (doi:10.1186/s13054-019-2685-1), 2019-12-01
Supplement: MOESM4 [file 17789658]

**Additional File 4: Demographic and microbiological characteristics of 80 children with sepsis and septic shock treated with veno-arterial Extracorporeal Membrane Oxygenation (ECMO) compared between children who survived and children that died.**

| <b>Characteristic</b>    | <b>Variable</b>                      | <b>Survived<br/>N=44 (55%)</b> | <b>Died<br/>N=36 (45%)</b> | <b><i>p-value</i><sup>a</sup></b> |
|--------------------------|--------------------------------------|--------------------------------|----------------------------|-----------------------------------|
| <b>Age</b>               | age (days), median (IQR)             | 1241 (36.5, 2595.5)            | 308.50 (63.5, 1272)        | 0.19                              |
|                          | Infants (birth-364d)                 | 20 (45%)                       | 25 (69%)                   | 0.068                             |
|                          | 1-4 years                            | 11 (25%)                       | 3 (8%)                     |                                   |
|                          | 5-9 years                            | 10 (23%)                       | 4 (11%)                    |                                   |
|                          | 10-15 years                          | 3 (7%)                         | 4 (11%)                    |                                   |
| <b>Indigenous status</b> | Indigenous or Torres Strait Islander | 2 (6%)                         | 2 (6%)                     | 0.88                              |
| <b>Demographics</b>      | % male                               | 27 (61%)                       | 22 (61%)                   | 0.98                              |
|                          | Weight, median (IQR)                 | 15.0 (3.55, 25.5)              | 8.3 (5.0, 18.0)            | 0.84                              |
| <b>Comorbidities</b>     | Interhospital transfer               | 30 (68%)                       | 23 (64%)                   | 0.69                              |
|                          | Congenital heart disease             | 5 (11%)                        | 3 (9%)                     | 0.65                              |
|                          | Immunosuppression                    | 2 (5%)                         | 5 (14%)                    | 0.14                              |
|                          | Oncology                             | 2 (5%)                         | 2 (6%)                     | 0.84                              |
| <b>ARDS</b>              | Acute Respiratory Distress Syndrome  | 8 (18%)                        | 5 (14%)                    | 0.61                              |
| <b>Year of admission</b> | 2003                                 | 2 (5%)                         | 1 (3%)                     | 0.98                              |
|                          | 2004                                 | 1 (2%)                         | 1 (3%)                     |                                   |
|                          | 2005                                 | 1 (2%)                         | 1 (3%)                     |                                   |
|                          | 2006                                 | 4 (9%)                         | 2 (6%)                     |                                   |
|                          | 2007                                 | 4 (9%)                         | 2 (6%)                     |                                   |
|                          | 2008                                 | 4 (9%)                         | 1 (3%)                     |                                   |
|                          | 2009                                 | 2 (5%)                         | 4 (11%)                    |                                   |

|                       |                                                      |          |          |       |
|-----------------------|------------------------------------------------------|----------|----------|-------|
|                       | 2010                                                 | 6 (14%)  | 4 (11%)  |       |
|                       | 2011                                                 | 4 (9%)   | 4 (11%)  |       |
|                       | 2012                                                 | 6 (14%)  | 4 (11%)  |       |
|                       | 2013                                                 | 3 (7%)   | 3 (8%)   |       |
|                       | 2014                                                 | 1 (2%)   | 2 (6%)   |       |
|                       | 2015                                                 | 2 (5%)   | 2 (6%)   |       |
|                       | 2016                                                 | 4 (9%)   | 5 (14%)  |       |
| <b>Pathogen group</b> | <b>Pathogen</b>                                      |          |          |       |
| <b>Bacteria</b>       | <i>N. meningitidis</i>                               | 7 (16%)  | 3 (8%)   | 0.31  |
|                       | <i>Group B streptococcus</i>                         | 3 (7%)   | 0 (0%)   | 0.11  |
|                       | <i>Group A Streptococcus, viridans streptococcus</i> | 10 (23%) | 3 (8%)   | 0.083 |
|                       | <i>S. pneumoniae</i>                                 | 0 (0%)   | 1 (3%)   | 0.27  |
|                       | <i>S. aureus</i>                                     | 8 (18%)  | 4 (11%)  | 0.38  |
|                       | <i>E. coli</i>                                       | 1 (2%)   | 1 (3%)   | 0.89  |
|                       | <i>Pseudomonas aeruginosa</i>                        | 1 (2%)   | 2 (6%)   | 0.44  |
|                       | Klebsiellaspp.                                       | 1 (2%)   | 0 (0%)   | 0.36  |
|                       | H.influenzae                                         | 0 (0%)   | 0 (0%)   | NA    |
|                       | Other bacteria                                       | 3 (7%)   | 4 (11%)  | 0.50  |
|                       | <b>Sum of patients with bacterial diagnosis</b>      | 31 (70%) | 18 (50%) | 0.062 |
| <b>Virus</b>          | Influenza                                            | 1 (2%)   | 0 (0%)   | 0.36  |
|                       | Parainfluenza                                        | 3 (7%)   | 0 (0%)   | 0.11  |
|                       | Respiratory Syncytial virus                          | 2 (5%)   | 0 (0%)   | 0.20  |
|                       | Adenovirus                                           | 0 (0%)   | 1 (3%)   | 0.27  |
|                       | Herpesviruses                                        | 1 (2%)   | 2 (6%)   | 0.44  |
|                       | Human Metapneumovirus                                | 0 (0%)   | 1 (3%)   | 0.27  |
|                       | Enterovirus                                          | 0 (0%)   | 0 (0%)   | NA    |

|                                                                  |          |          |       |
|------------------------------------------------------------------|----------|----------|-------|
| Other virus                                                      | 0 (0%)   | 0 (0%)   | NA    |
| <b><i>Sum of patients with viral coinfection</i></b>             | 6 (14%)  | 4 (11%)  | 0.73  |
| <b><i>No bacterial, fungal, or viral organism identified</i></b> | 10 (23%) | 15 (42%) | 0.069 |

<sup>a</sup>p-value based on Two-sample Wilcoxon rank-sum (Mann-Whitney) test

<sup>b</sup> first observation, the measure must be obtained within the first 60minutes of PICU admission

ARDS, Acute Respiratory Distress Syndrome; ECMO, extracorporeal membrane oxygenation; PICU, paediatric intensive care unit; PIM2, paediatric index of mortality 2
