# Supplementary material for: Defining benefit threshold for extracorporeal membrane oxygenation in children with sepsis—a binational multicenter cohort study
Source: Springer Nature journal article supplement (doi:10.1186/s13054-019-2685-1), 2019-12-01

### Additional File 5: Distribution of predicted mortality.

The predicted mortality risk is adjusted for covariates on respiratory failure (PaO<sub>2</sub>/FiO<sub>2</sub> ratio, intubation, treatment with HFOV), cardiovascular (arterial hypotension, cardiac arrest pre ICU admission), metabolic (high lactate), Central Nervous System (dilated pupils), and renal (need for renal replacement) dysfunction, and underlying immunosuppression.

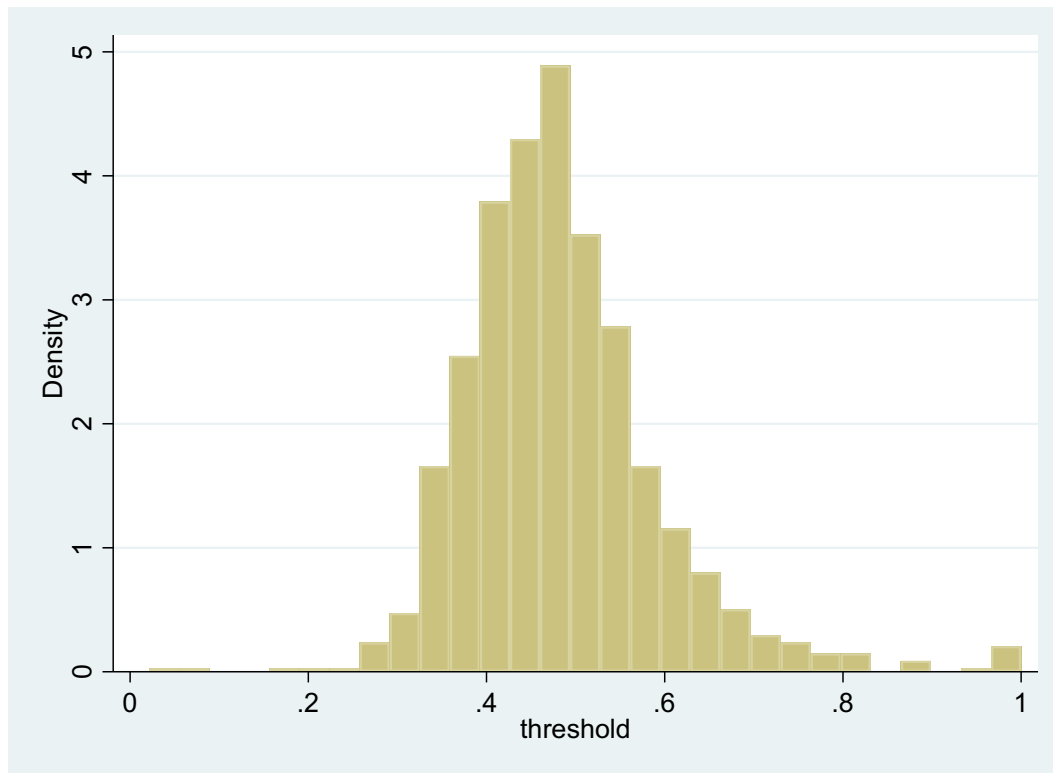

Supplement: MOESM5 [file 17789658]
