# Supplementary material for: Defining benefit threshold for extracorporeal membrane oxygenation in children with sepsis—a binational multicenter cohort study
Source: Springer Nature journal article supplement (doi:10.1186/s13054-019-2685-1), 2019-12-01

**Additional File 7: Extracorporeal Membrane Oxygenation (ECMO) flow rates measured at 4 hours (in ml/kg/min) post cannulation in n=80 children treated with veno-arterial ECMO for septic shock. Flow rates are compared between children that underwent peripheral cannulation (n=23) versus children that underwent central cannulation (n=57), split into those that survived (n=44) and that died (n=36).**

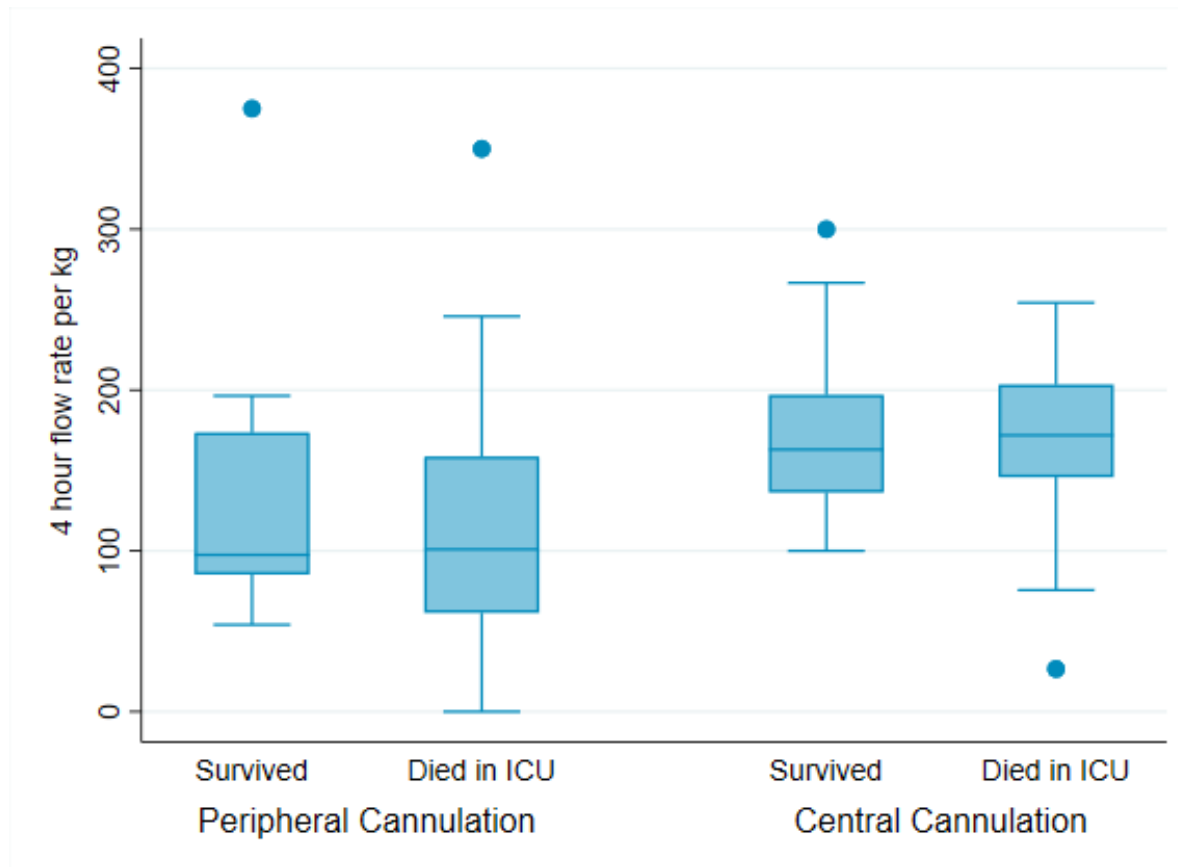

Supplement: MOESM7 [file 17789658]
